# Supplementary material for: Molecularly self‐fueled nano-penetrator for nonpharmaceutical treatment of thrombosis and ischemic stroke
Source: PubMed Central journal article supplement (PMC9845202; doi:10.1038/s41467-023-35895-5), 2023-01-17
Supplement: 41467_2023_35895_MOESM1_ESM.pdf [file 41467_2023_35895_MOESM1_ESM.pdf]

## **Supplementary Information**

Title:

### **Molecularly Self-Fueled Nano-Penetrator for Nonpharmaceutical Treatment of Thrombosis and Ischemic Stroke**

**Authors:** Hongyuan Zhang<sup>1#</sup>, Zhiqiang Zhao<sup>1#</sup>, Shengnan Sun<sup>1</sup>, Sen Zhang<sup>2</sup>, Yuequan Wang<sup>1</sup>, Xuanbo Zhang<sup>1</sup>, Jin Sun<sup>1</sup>, Zhonggui He<sup>1</sup>, Shenwu Zhang<sup>1\*</sup>, Cong Luo<sup>1\*</sup>

#### **Affiliations:**

<sup>1</sup>Department of Pharmaceutics, Wuya College of Innovation, Shenyang Pharmaceutical University, Shenyang 110016, P. R. China

<sup>2</sup>Key Laboratory of Structure-Based Drug Design and Discovery of Ministry of Education, Shenyang Pharmaceutical University, Shenyang 110016, P. R. China

#### **\*Corresponding authors:**

Cong Luo, Ph.D. and Shenwu Zhang, Ph.D.

Department of Pharmaceutics, Wuya College of Innovation, Shenyang Pharmaceutical University, No. 103 Wenhua Road, Shenyang 110016, P. R. China

E-mail: luocong@syphu.edu.cn; zhangshenwu@aliyun.com

<sup>#</sup>These authors contributed equally to this work.

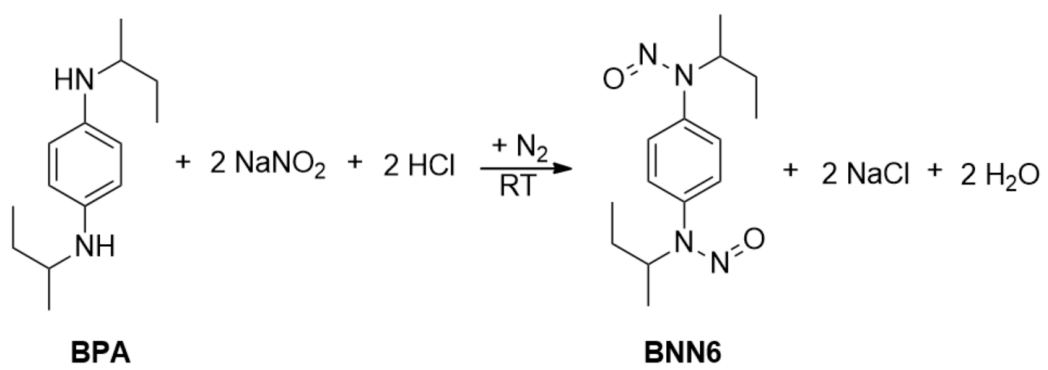

**Supplementary Fig. 1** Synthesis route of BNN6.

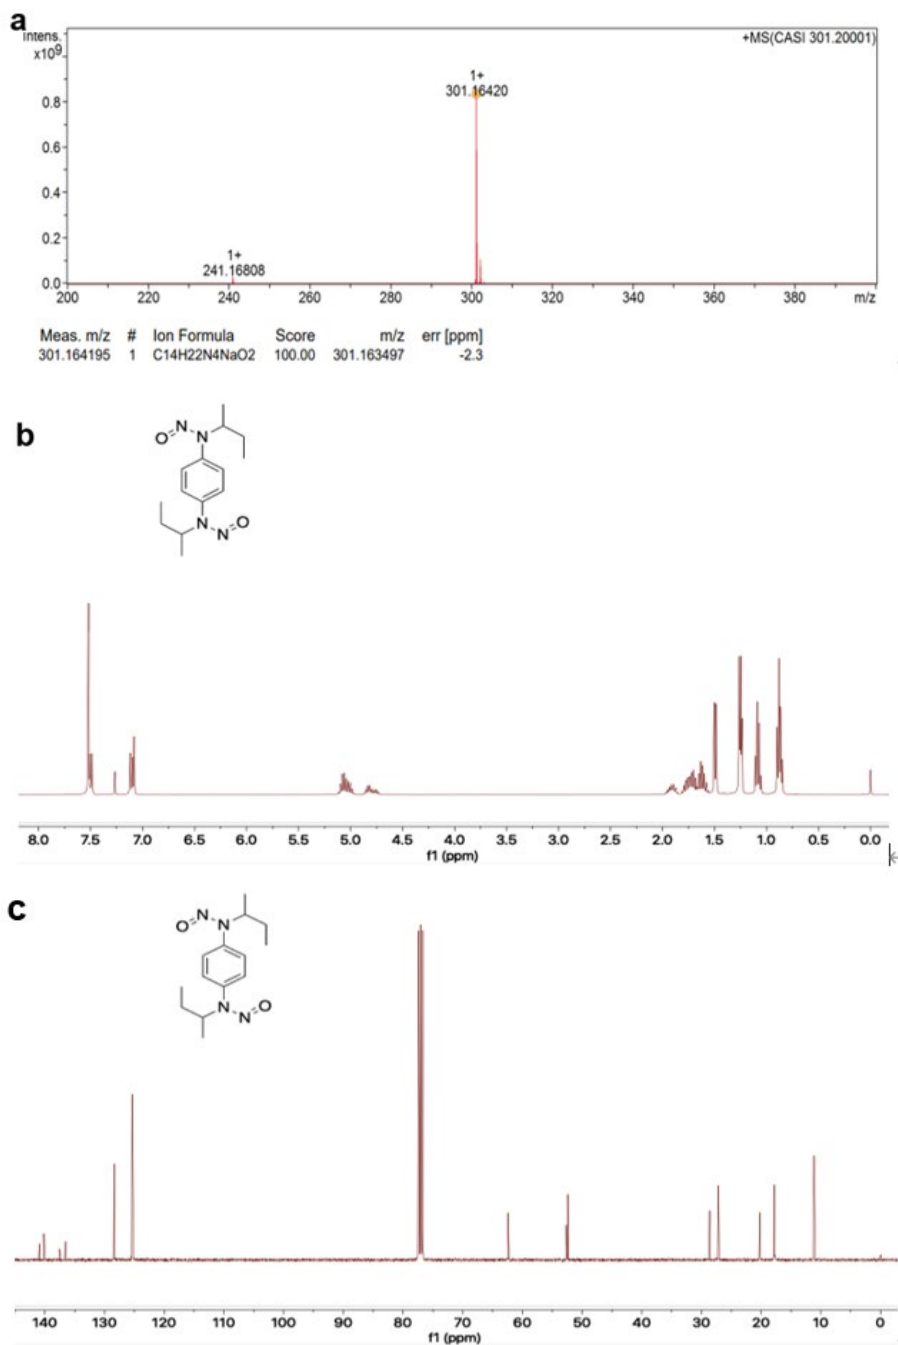

**Supplementary Fig. 2** (a) Mass spectrometry result of BNN6. (b) <sup>1</sup>H NMR spectra of BNN6(400 MHz, CDCl<sub>3</sub>)  $\delta$ 7.50 (4H), 5.05-4.89 (2H), 2.00-1.84 (2H), 1.71-1.49 (2H), 1.25 (t, J = 7.6 Hz, 6H), 1.08 (td, J = 7.4, 5.3 Hz, 6H). (c) <sup>13</sup>C NMR spectra of BNN6 (400 MHz, CDCl<sub>3</sub>)  $\delta$ 128.03, 124.95, 52.05, 28.31, 17.40, 10.07.

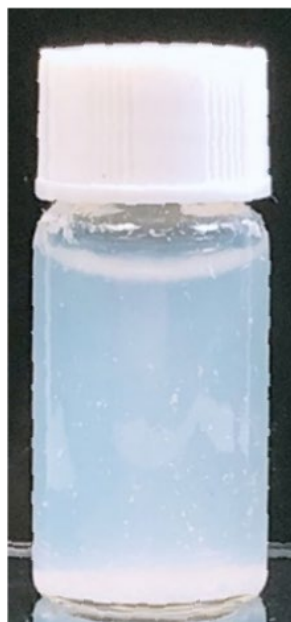

**Supplementary Fig. 3** Aqueous dispersion of BNN6.

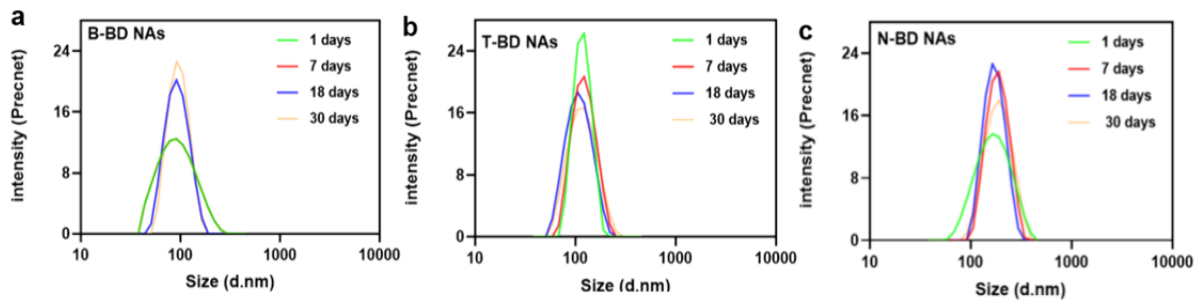

**Supplementary Fig. 4** Long-term stability of (a) B-BD NAs, (b) T-BD NAs, and (c) N-BD NAs stored at 4°C under dark conditions.

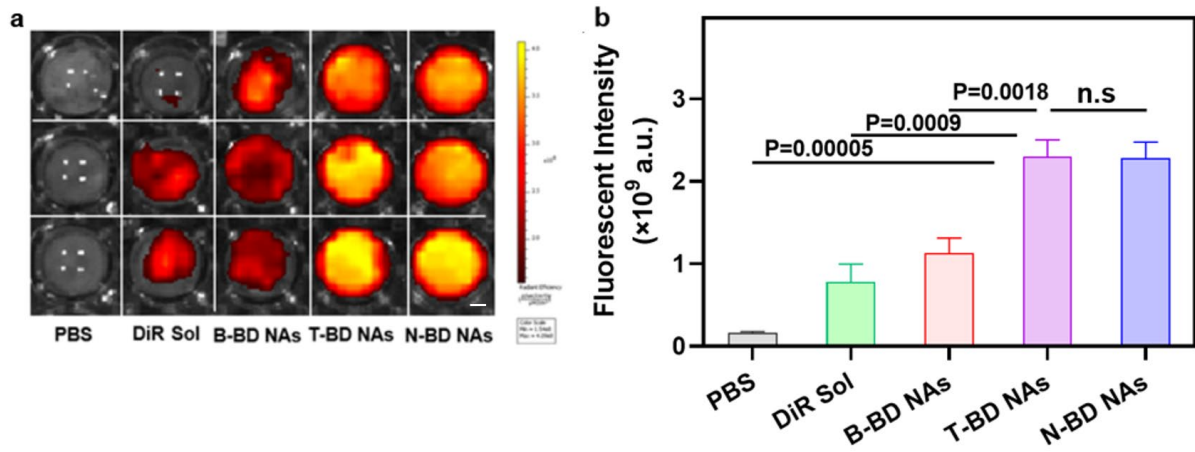

**Supplementary Fig. 5** (a) Representative In vitro thrombus-targeting fluorescence images (scale bar = 100  $\mu\text{m}$ ) and (b) quantitative results in artificial whole blood clots treated with different formulations Data are presented as mean  $\pm$  SD (n=3 independent experiments) Source data are provided as a Source Data file. One-way ANOVA (one-sided) with Dunnett's multiple comparisons test was used for the analysis of data and adjusted P value.

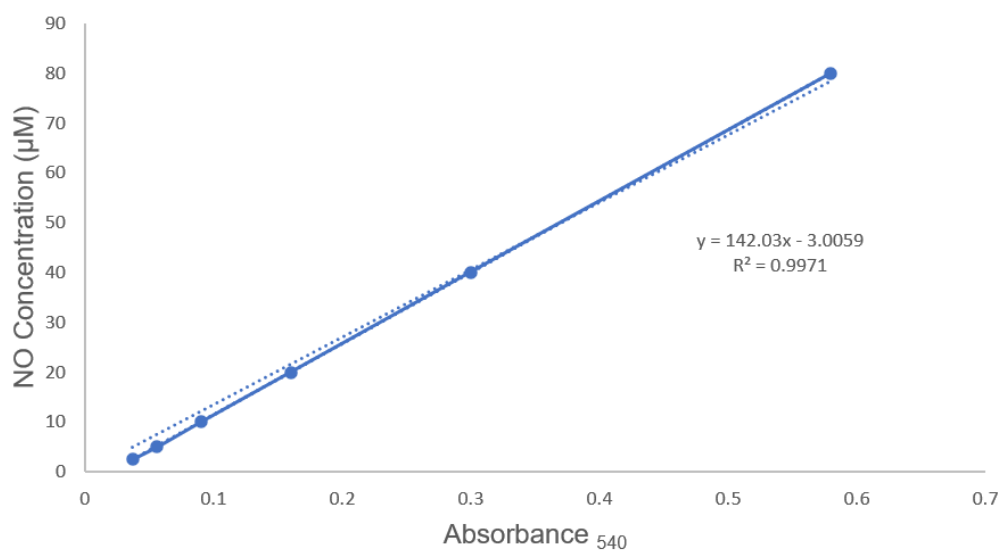

**Supplementary Fig. 6** Concentration-absorbance calibration curve of  $\text{NaNO}_2$  determined by the Griess assay at 540 nm.

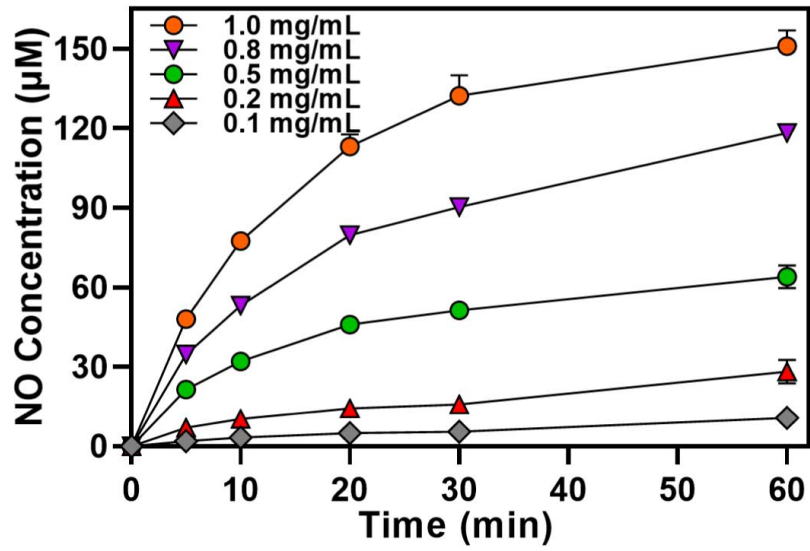

**Supplementary Fig. 7** NO generation from T-BD NAs at different concentrations of BNN6 under 808 nm laser irradiation ( $2\text{W}/\text{cm}^2$ ), Data are presented as mean  $\pm$  SD ( $n=3$  independent experiments) Source data are provided as a Source Data file.



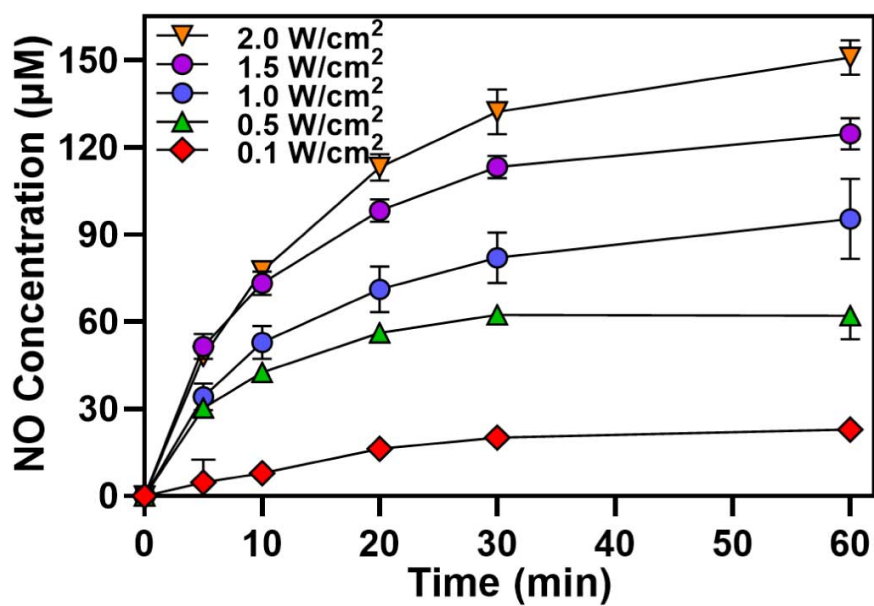

**Supplementary Fig. 8** NO generation from T-BD NAs (0.548 mg/mL of DiR and 0.452 mg/mL of BNN6) with different laser power density (808 nm), Data are presented as mean  $\pm$  SD (n=3 independent experiments) Source data are provided as a Source Data file.

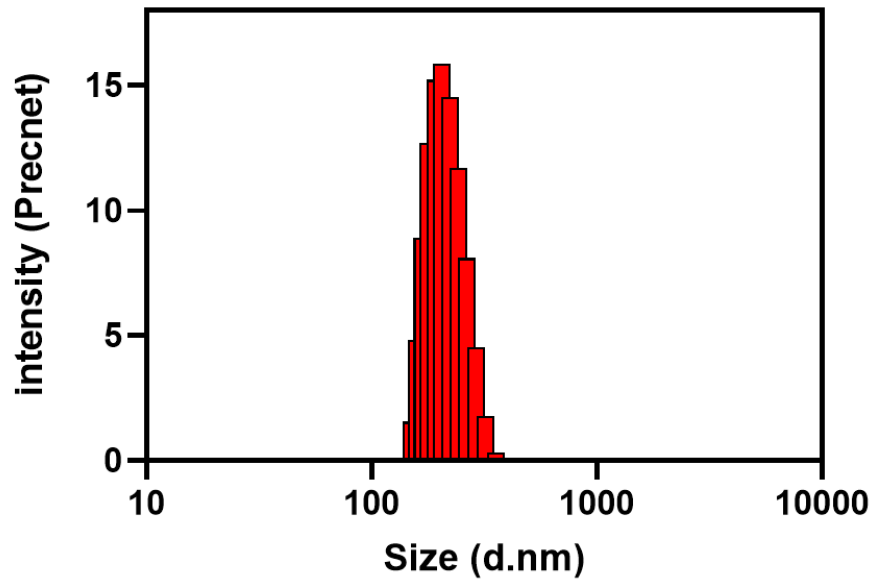

Supplementary Fig. 9 Particle size of PLGA-BD NPs.

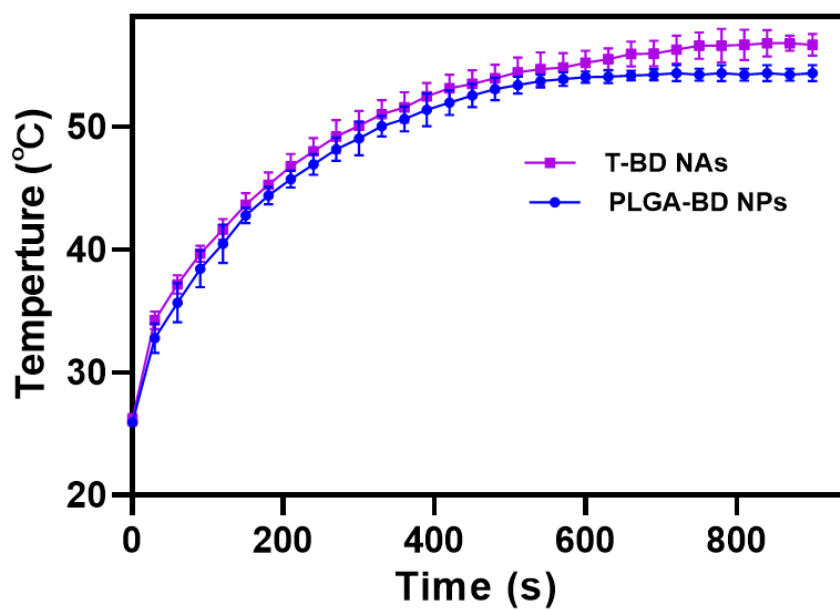

**Supplementary Fig. 10** Photothermal curves of T-BD NAs and PLGA-BD NPs under 808 nm laser irradiation ( $2\text{W}/\text{cm}^2$ ), Data are presented as mean  $\pm$  SD (n=3 independent experiments) Source data are provided as a Source Data file.

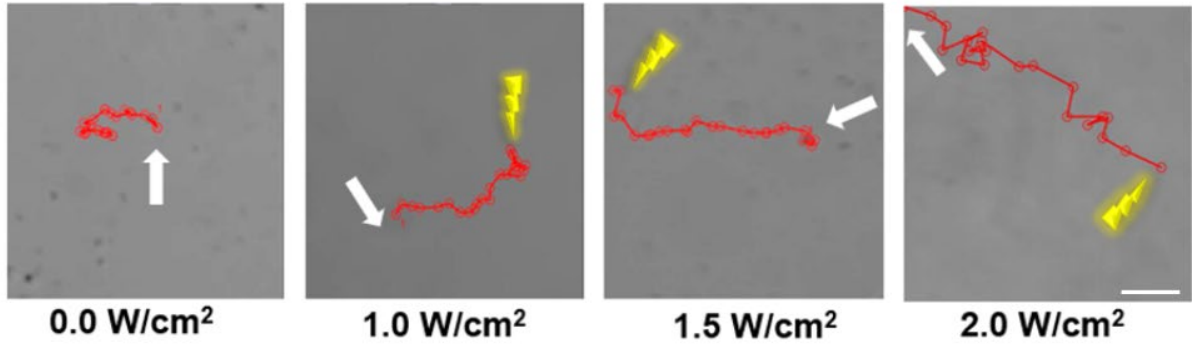

**Supplementary Fig. 11** Movement trajectories of T-BD NAs recorded by a fluorescence microscope with Nikon camera under 808 nm laser irradiation with different power intensity from 0 W/cm<sup>2</sup> to 2 W/cm<sup>2</sup>, scale bar = 1  $\mu$ m. Experiment was repeated three times independently with similar results.

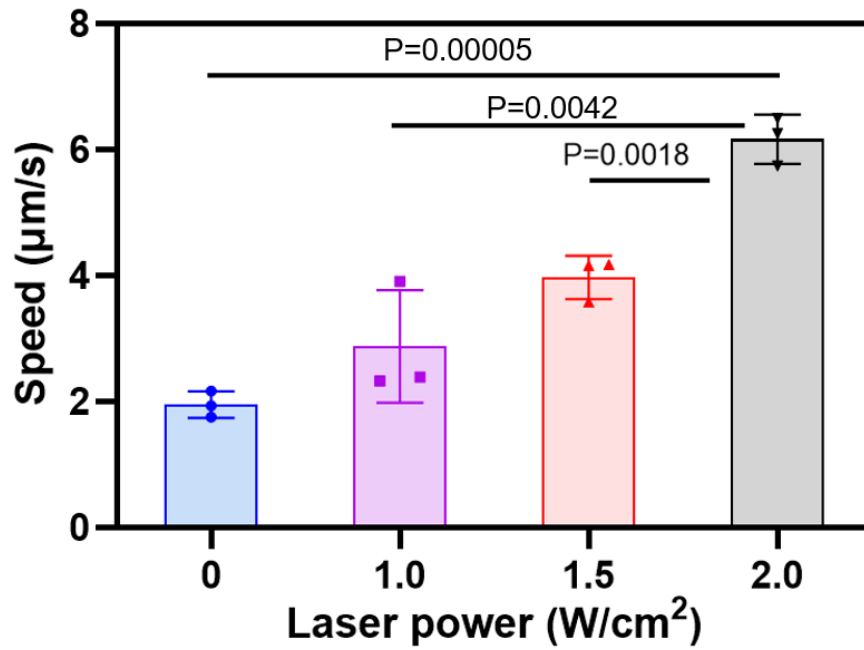

**Supplementary Fig. 12** Motion speed of T-BD NAs in PBS (pH 7.4) under 808 nm laser irradiation with different power intensity from 0 W/cm<sup>2</sup> to 2 W/cm<sup>2</sup>, Data are presented as mean ± SD (n=3 independent experiments) Source data are provided as a Source Data file.

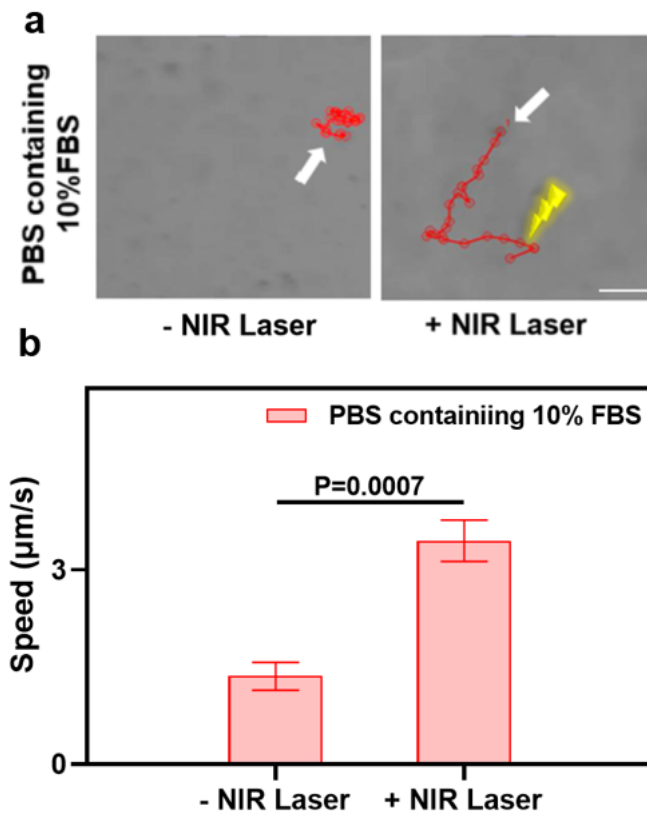

**Supplementary Fig. 13** (a) Movement trajectories and (b) motion speed of T-BD NAs in PBS (pH 7.4) containing 10% FBS under 808 nm laser irradiation ( $2 \text{ W/cm}^2$ , 60 s), scale bar =  $1 \mu\text{m}$ . Data are presented as mean  $\pm$  SD (n=3 independent experiments) Source data are provided as a Source Data file.

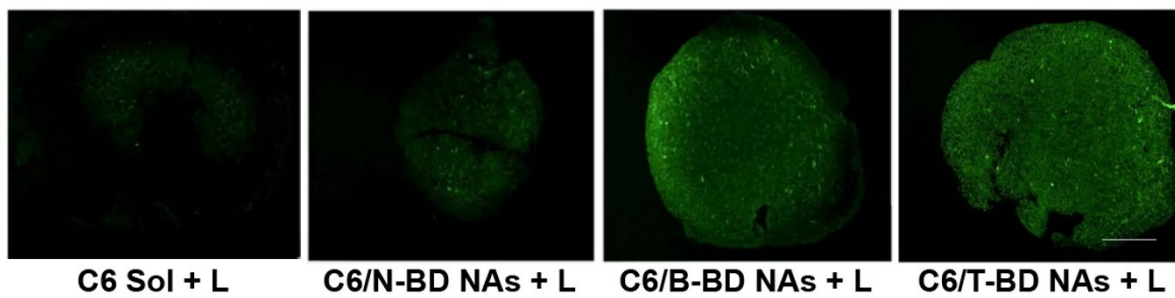

**Supplementary Fig. 14** Fluorescence imaging of small red thrombus sections incubated with free C-6, C6/N-BD NAs, C6/B-BD NAs or C6/T-BD NAs under 808 nm laser irradiation ( $2 \text{ W/cm}^2$ , 15 min). scale bar =  $1 \mu\text{m}$ . Experiment was repeated three times independently with similar results.

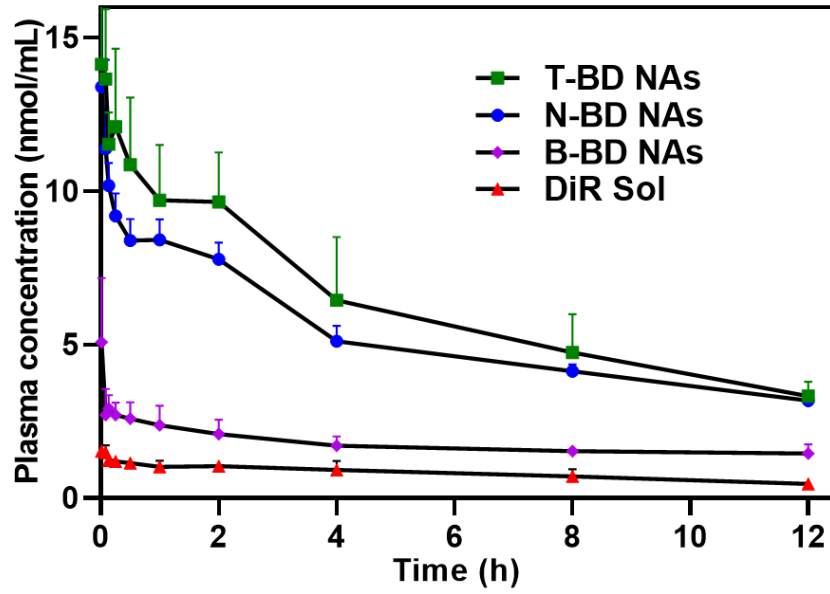

**Supplementary Fig. 15** Pharmacokinetic profiles of DiR Sol, B-BD NAs, T-BD NAs, and N-BD NAs after intravenous administration at an equivalent DiR dose of 5 mg/kg, n=5. Data are presented as mean  $\pm$  SD (n=5 rats) Source data are provided as a Source Data file.



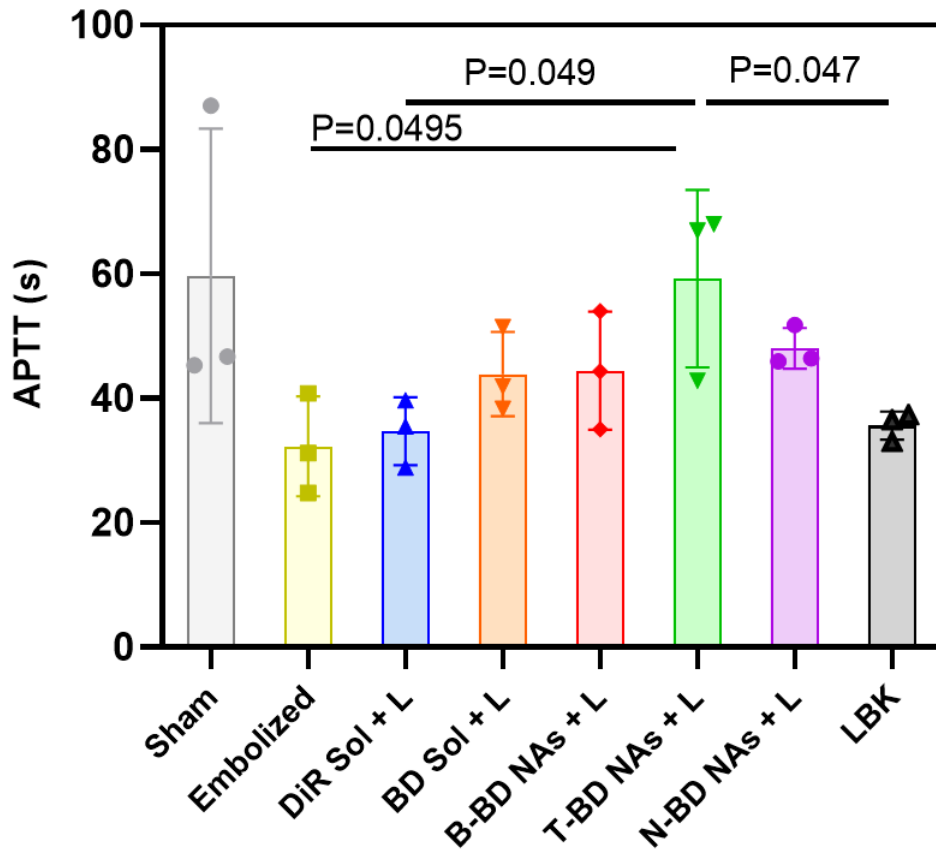

**Supplementary Fig. 16** The coagulation indicators of activated partial thromboplastin time (APTT) in FeCl<sub>3</sub>-induced rat carotid arterial thrombosis model after different treatments (DiR equivalent dose 5 mg/kg, n=3). Data are presented as mean ± SD. Source data are provided as a Source Data file.

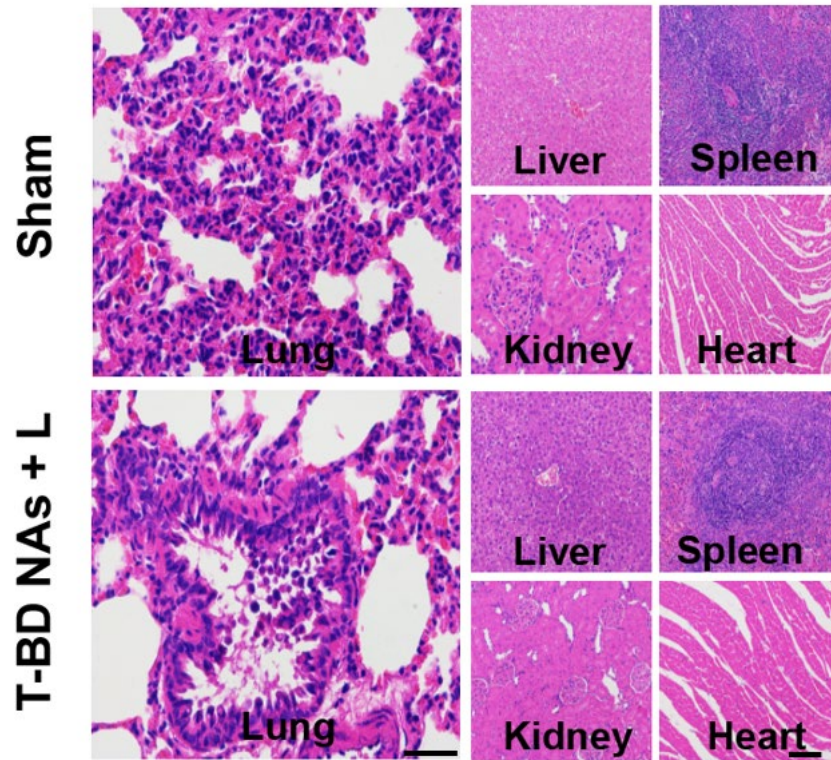

**Supplementary Fig. 17** H&E staining sections of the major organs (heart, liver, spleen, lung, and kidney) of rats after treatment with T-BD NAs for 14 days in FeCl<sub>3</sub>-induced rat carotid arterial thrombosis model under laser irradiation (2.0 W/cm<sup>2</sup>, 15 min), scale bar = 100 μm. The Sham rats were used as control. Experiment was repeated three times independently with similar results.

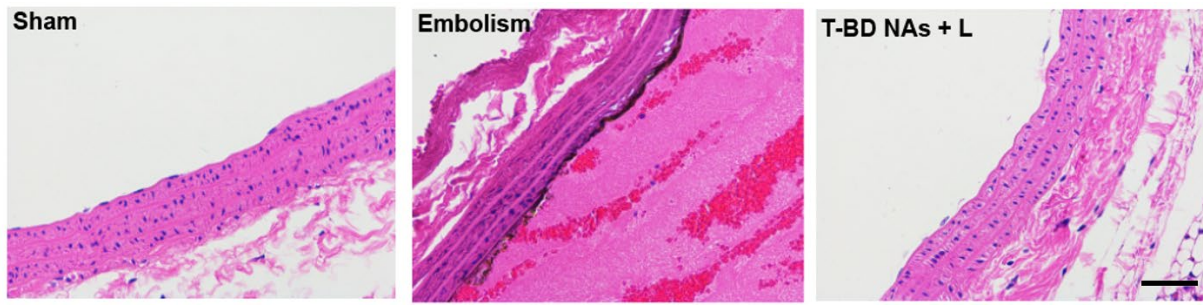

**Supplementary Fig. 18** H&E staining sections of carotid artery in rats after various treatment: Sham group, Embolism group, and T-BD NAs + L group (808 nm laser irradiation, 2.0 W/cm<sup>2</sup>, 15 min), scale bar = 100  $\mu$ m. Experiment was repeated three times independently with similar results.

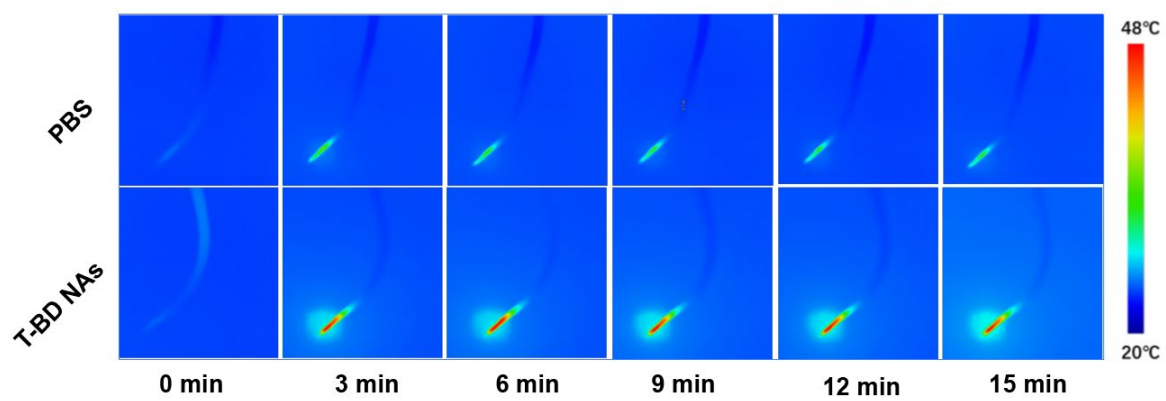

**Supplementary Fig. 19** In vivo photothermal imaging of T-BD NAs in the embolized tails.

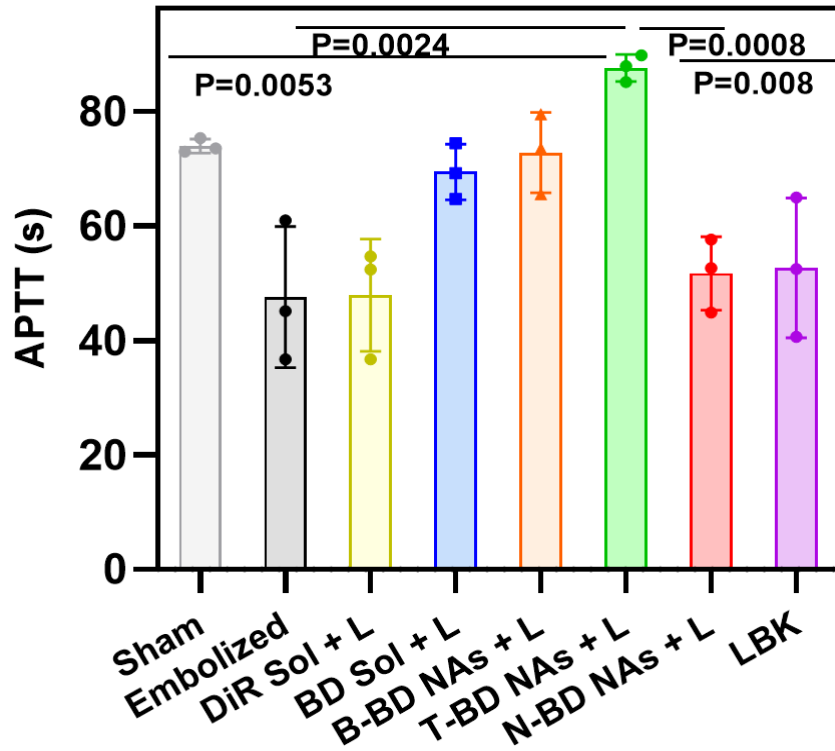

**Supplementary Fig. 20** The coagulation indicators of activated partial thromboplastin time (APTT) after different treatments in mouse tail thrombosis model (DiR equivalent dose 5 mg/kg, n=3). Data are presented as mean  $\pm$  SD (n=5 rats) Source data are provided as a Source Data file.

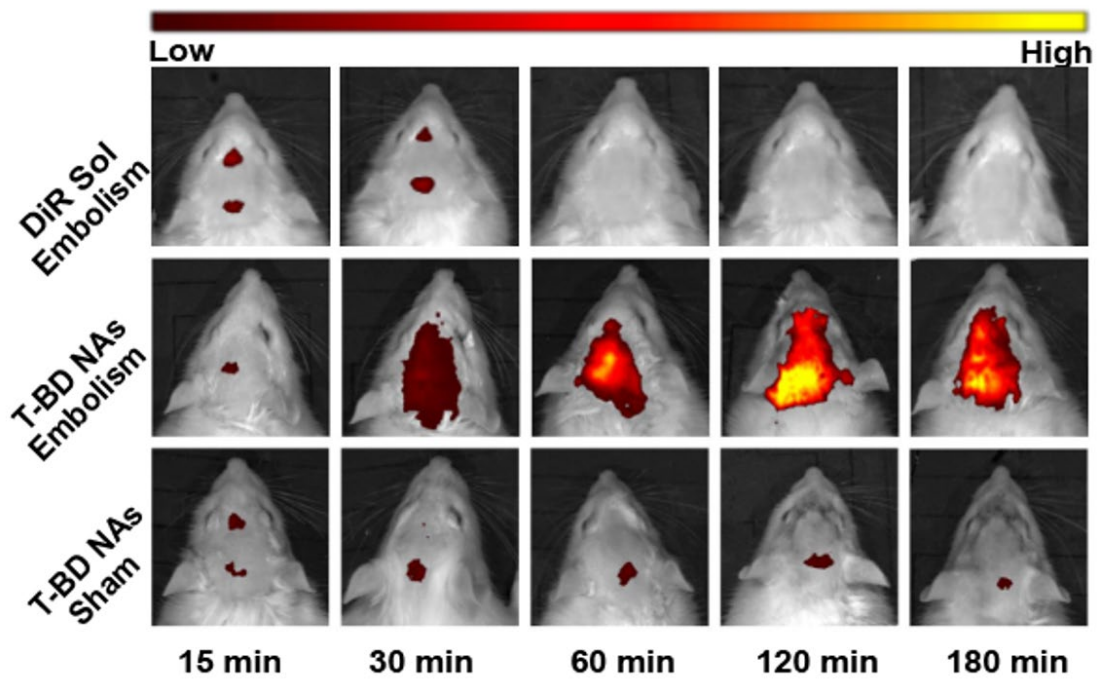

**Supplementary Fig. 21** Brain fluorescence imaging of T-BD NAs and DiR Sol in the MCAO model rats and health rats (Sham) after intravenous injection at an equivalent DiR dose of 5 mg/kg.

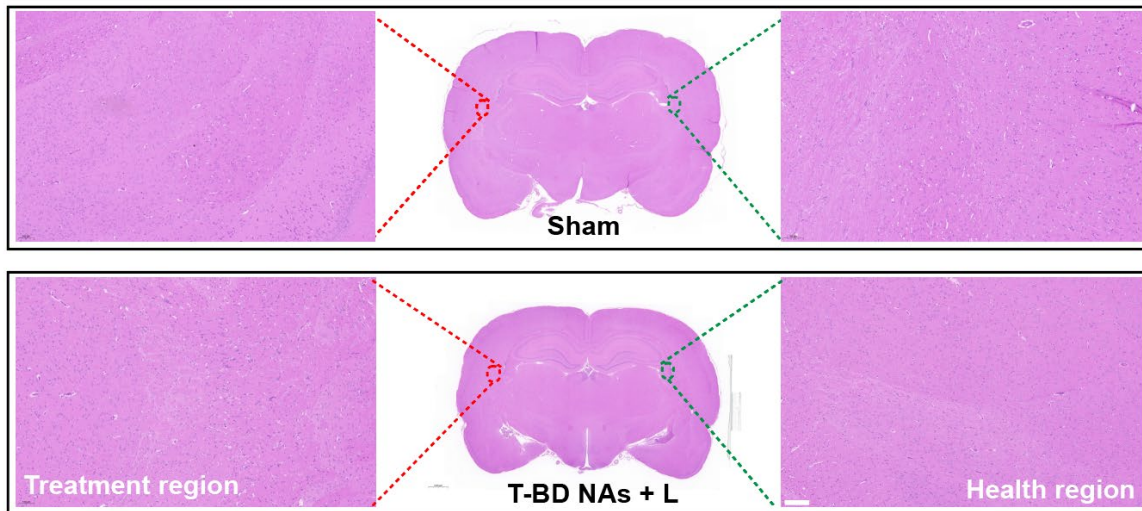

**Supplementary Fig. 22** H&E staining sections of the brain tissues in the Sham group and T-BD NAs + L group ( $2 \text{ W/cm}^2$ , 15 min), scale bar =  $100 \mu\text{m}$ . Experiment was repeated three times independently with similar results.

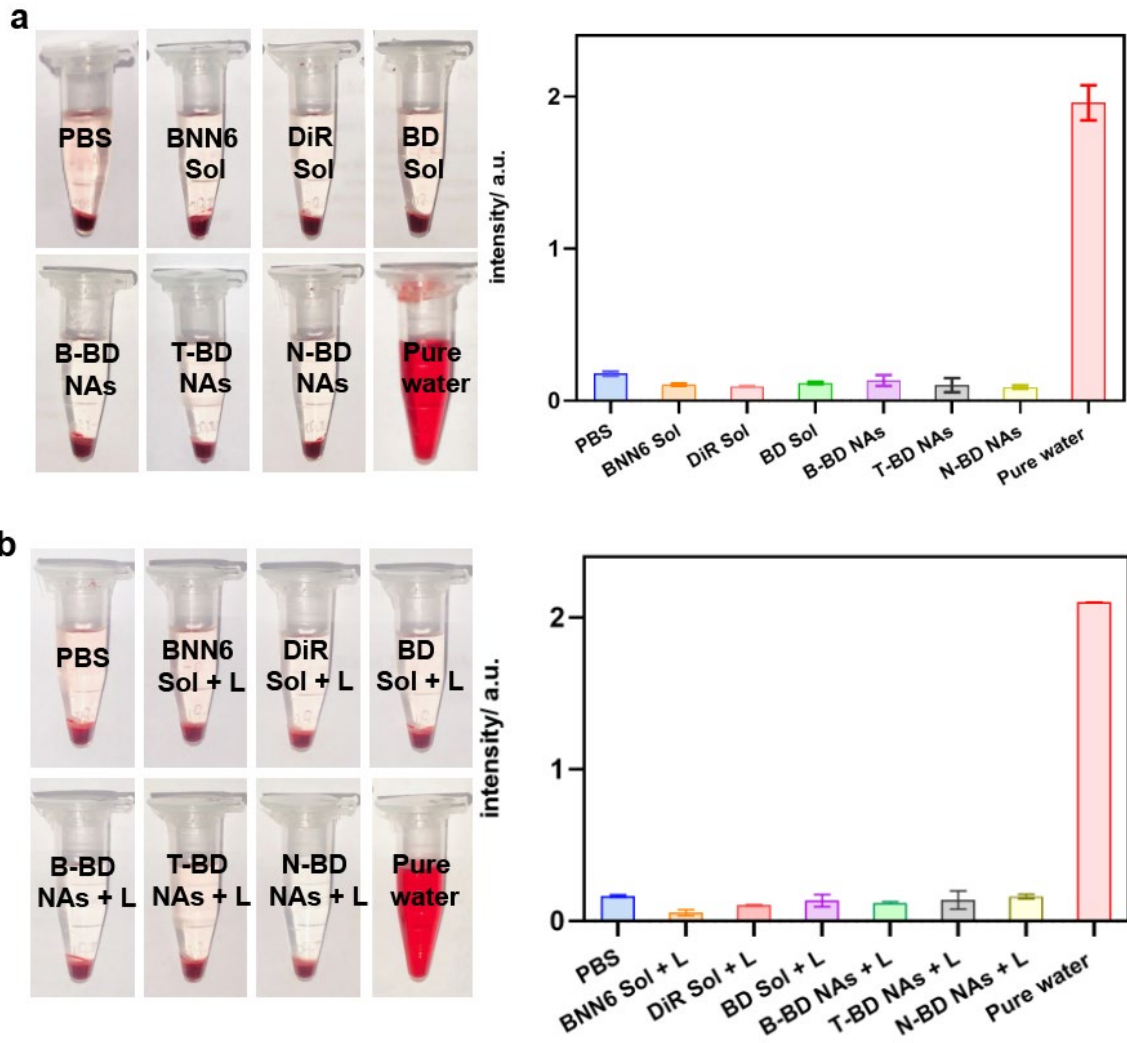

**Supplementary Fig. 23** (a) Hemolysis results and quantitative analysis of hemoglobin content in the supernatants without laser irradiation. (b) Hemolysis images and quantitative analysis of hemoglobin content in the supernatants with the laser irradiation ( $2 \text{ W/cm}^2$ , 5 min). Data are presented as mean  $\pm$  SD ( $n=3$  independent experiments) Source data are provided as a Source Data file.



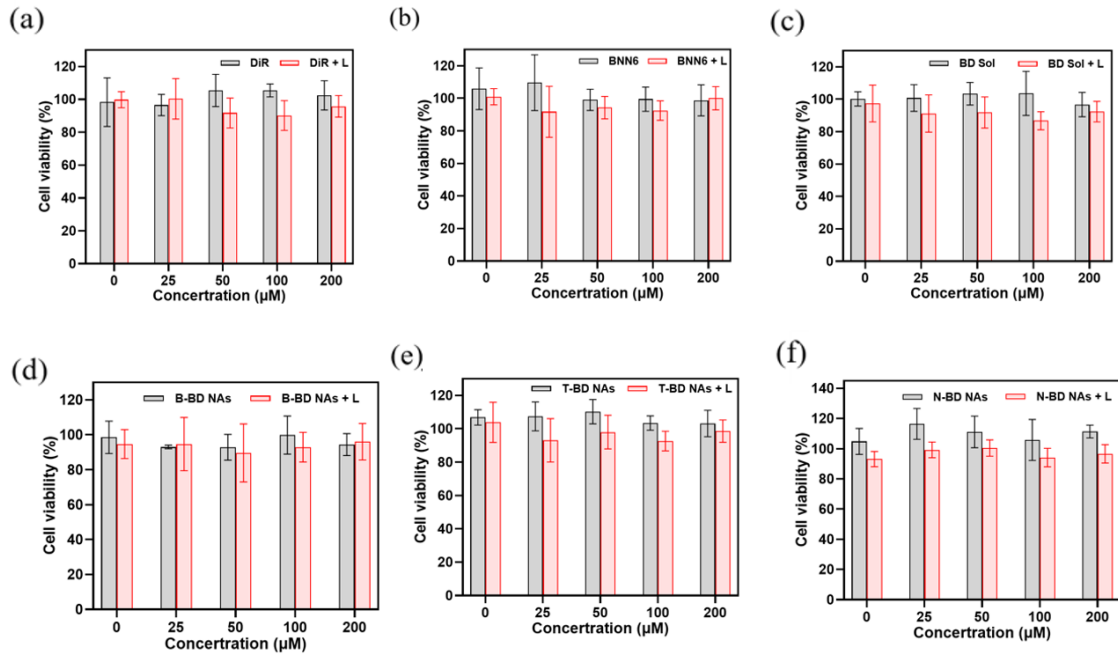

**Supplementary Fig. 24** Cell viability of HUVEC after incubation with various concentrations of (a) DiR Sol, (b) BNN6 Sol, (c) BD Sol, (d) B-BD NAs, (e) T-BD NAs or (f) N-BD NAs for 48 h with/without laser irradiation (2 W/cm<sup>2</sup>, 5 min). Data are presented as mean ± SD (n=3 biologically independent cells) Source data are provided as a Source Data file.

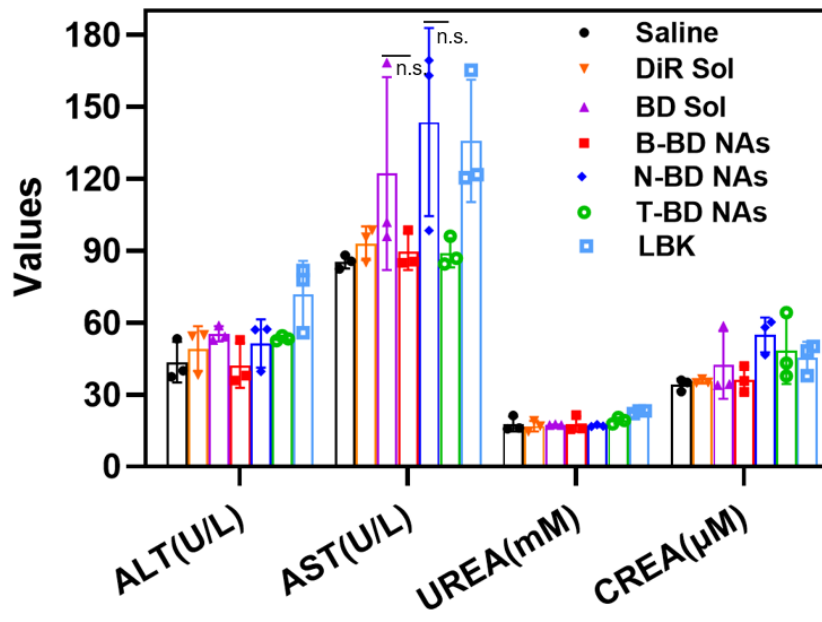

**Supplementary Fig. 25** Hepatorenal function parameters of the rats after different treatments (n=3). Data are presented as mean  $\pm$  SD. Source data are provided as a Source Data file.

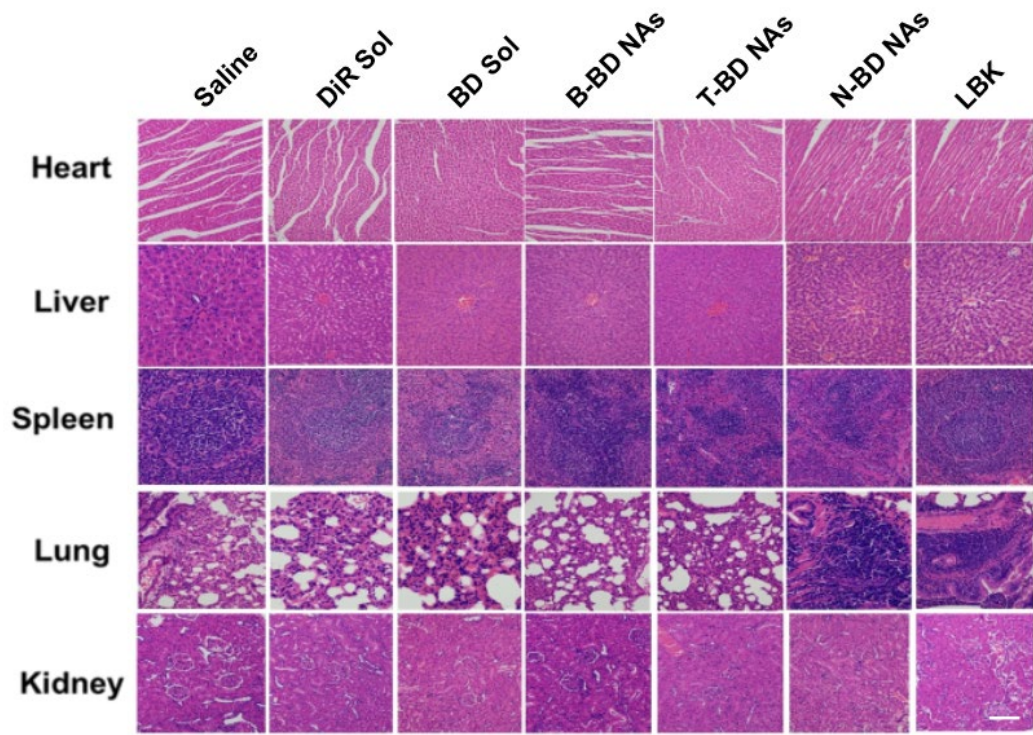

**Supplementary Fig. 26** H&E staining sections of the heart, liver, spleen, lung, and kidney in the MCAO rats after different treatments, scale bar = 100  $\mu\text{m}$ . Experiment was repeated three times independently with similar results.

**Supplementary Tab. 1** Characterization of B-BD NAs at different molar ratios of DiR and BNN6.

| Formulations (DiR/BNN6) | Size <sup>a</sup> (nm) | PDI <sup>b</sup> |
|-------------------------|------------------------|------------------|
| 10:1                    | 137.7 ± 1.8            | 0.06 ± 0.04      |
| 8:1                     | 138.8 ± 6.3            | 0.13 ± 0.03      |
| 5:1                     | 135.7 ± 7.2            | 0.11 ± 0.01      |
| 3:1                     | 128.3 ± 1.1            | 0.16 ± 0.05      |
| 1:1                     | 91.3 ± 2.5             | 0.09 ± 0.01      |
| 1:3                     | 76.1 ± 0.8             | 0.12 ± 0.01      |
| 1:5                     | 77.9 ± 7.4             | 0.26 ± 0.01      |
| 1:8                     | 176.4 ± 23.1           | 0.34 ± 0.02      |
| 1:10                    | 168.7 ± 16.7           | 0.47 ± 0.14      |

<sup>a</sup>) Mean diameters of B-BD NAs measured by DLS. <sup>b</sup>) Polydispersity index of B-BD NAs.

**Supplementary Tab. 2** Characterization of B-BD NAs, T-BD NAs and N-BD NAs.

| NAs      | Size <sup>a</sup> (nm) | PDI <sup>b</sup> | Zeta <sup>a</sup> (mV) | Drug loading rates <sup>c</sup> |       |
|----------|------------------------|------------------|------------------------|---------------------------------|-------|
|          |                        |                  |                        | DiR                             | BNN6  |
| B-BD NAs | 76.1 ± 0.8             | 0.12 ± 0.01      | 18.33 ± 0.46           | 54.8%                           | 45.2% |
| T-BD NAs | 105.0 ± 9.2            | 0.11 ± 0.02      | -7.65 ± 2.17           | 41.1%                           | 33.9% |
| N-BD NAs | 118.7 ± 1.3            | 0.33 ± 0.02      | -5.80 ± 1.31           | 45.4%                           | 29.4% |

<sup>a)</sup> Mean diameters and Zeta potential of NAs measured by DLS. <sup>b)</sup> Polydispersity index of NAs. <sup>c)</sup> Drug loading rate of NAs.

**Supplementary Tab. 3** Pharmacokinetic parameters of DiR Sol, B-BD NAs, T-BD NAs, and N-BD NAs (n=5).

| Formulations | $C_{1h}^{a)}$   | $AUC_{0-12h}^{b)}$ |
|--------------|-----------------|--------------------|
| DiR Sol      | $1.01 \pm 0.21$ | $9.720 \pm 1.02$   |
| B-BD NAs     | $2.38 \pm 0.64$ | $21.06 \pm 1.25$   |
| T-BD NAs     | $9.71 \pm 1.80$ | $75.23 \pm 6.28$   |
| N-BD NAs     | $8.42 \pm 0.67$ | $63.01 \pm 1.57$   |

<sup>a)</sup> The plasma concentration at 1 h (nmol/mL). <sup>b)</sup> Area under the plasma concentration-time curve (nmol/mL\*h).
